# Supplementary material
Source: PubMed Central journal article supplement (PMC3578121)
Supplement: NIHMS439251-supplement-01.pdf [file NIHMS439251-supplement-01.pdf]

**Supplemental Data for Levan, *et al.***

**“*Vibrio cholerae* cytolysin recognizes the heptasaccharide core of complex N-glycans with nanomolar affinity.”**

## Supplemental Data Figure Captions

Figure S1. Isothermal Titration Calorimetry data. ITC data for the titration of the VCC  $\beta$ -prism domain with six monosaccharides. In each panel, the raw data is shown above and the fit binding isotherm is shown below. No binding was reported in cases where the isotherm exhibited zero slope. Fit values are listed in Table 1 of the main manuscript.

Figure S2. ITC data for six additional carbohydrates.

Figure S3. ITC data for wild-type VCC binding to Me- $\alpha$ -mannose. The binding affinity for Me- $\alpha$ -mannose binding to full-length VCC was determined to be  $1.4 \pm 0.1$  mM, which is consistent with the measured value of  $3.24 \pm 0.1$  mM obtained for Me- $\alpha$ -mannose binding to the isolated VCC  $\beta$ -prism domain.

Figure S4. Crystallographic data statistics for the structure of the VCC  $\beta$ -prism domain with Me- $\alpha$ -mannose bound.

Figure S5. Glycan array data for the 25 glycans with the strongest fluorescence signals. Data is shown for Alexa fluor 488-labeled wild-type VCC incubated with the array at 1 and 10  $\mu$ g/mL concentrations. The table contains the identification number of the glycan on the array, a schematic using CFG standardized nomenclature, the chemical structure of the glycan, and the magnitude of the relative fluorescence unit signal normalized to the highest value on the chip (#328). The top 25 binders were identified by averaging the normalized

signal measured for each glycan with 1, 10, and 180  $\mu\text{g}/\text{mL}$  VCC. A key for the CFG nomenclature and the chemical substrate that the glycan is attached to are listed.

Figure S6. Glycan array data for additional glycans of interest. VCC exhibits relatively little binding to high-mannose type glycans as well as fragments of the top binders in Figure S5.

Figure S7. Fluorescence anisotropy for VCC $_{\beta\text{-prism}}$  D617A mutant binding to 2AA-labeled NGA2. Fluorescence anisotropy of a solution of 100 nM of 2AA-labeled NGA2 was monitored as purified  $\beta$ -prism domain (D617A) was titrated into the cuvette. A fit of the data from three replicates using the RandoA model in Origin 6.0 indicated a dissociation constant of  $20 \mu\text{M} \pm 6.1 \mu\text{M}$ .

Figure S8. Trp706 adopts two rotamer positions. Surface representation showing the different rotamer positions of Trp706 (red) in VCC $_{\beta\text{-prism}}$  chain B (left) and chain E (right). The closed position (left) is seen in five of six chains in the crystal asymmetric unit as well as in all 14 copies of the  $\beta$ -prism domain in the VCC heptamer structure (PDB 3O44). The open position (right) is seen in one chain of the current structure as well as the monomer structure bound to  $\beta$ -octyl glycoside (PDB 1XEZ). Movement of the side-chain into the open position creates a cleft (indicated by arrow) that could accommodate a polysaccharide glycan.

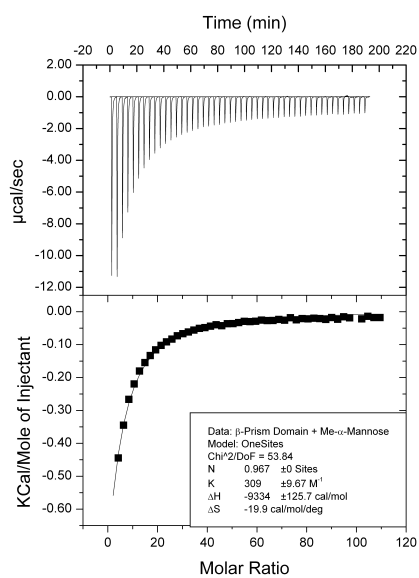

**Me- $\alpha$ -Mannose**

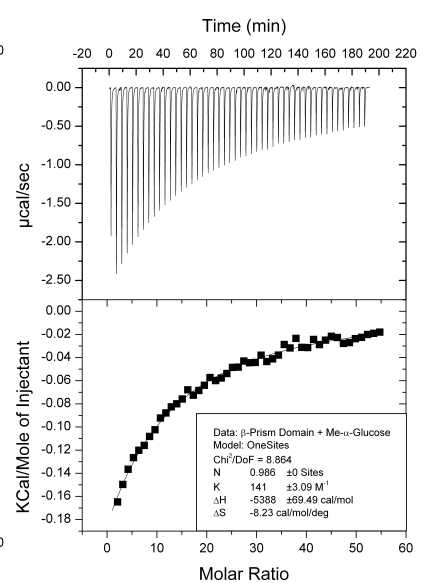

**Me- $\alpha$ -Glucose**

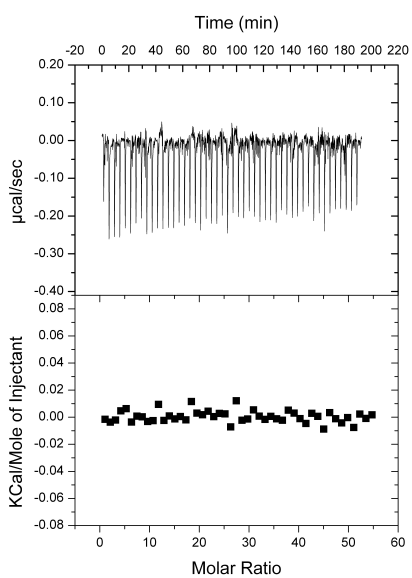

**Me- $\alpha$ -Galactose**

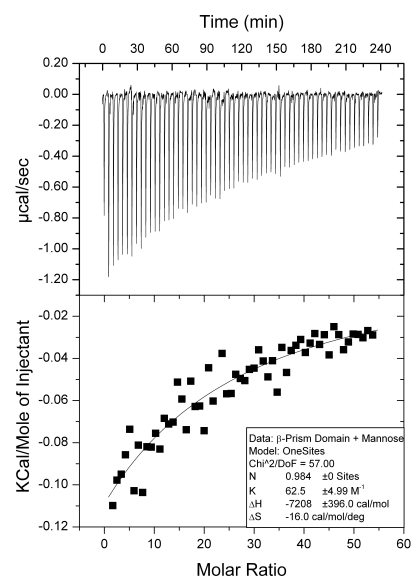

**D-Mannose**

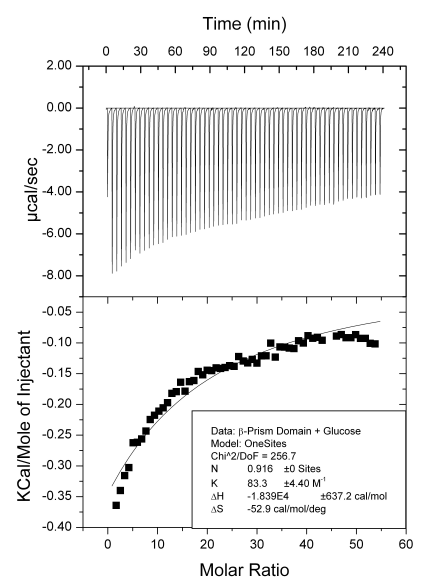

**D-Glucose**

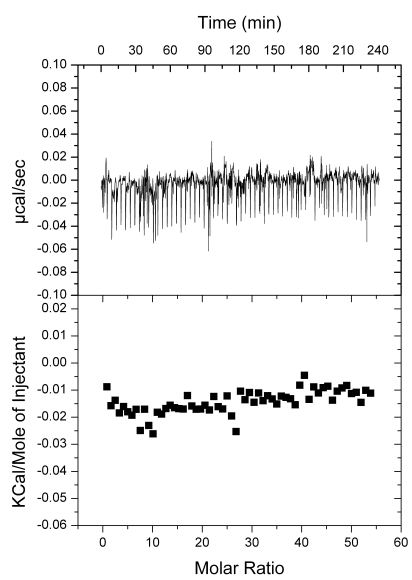

**D-Galactose**

Figure S1

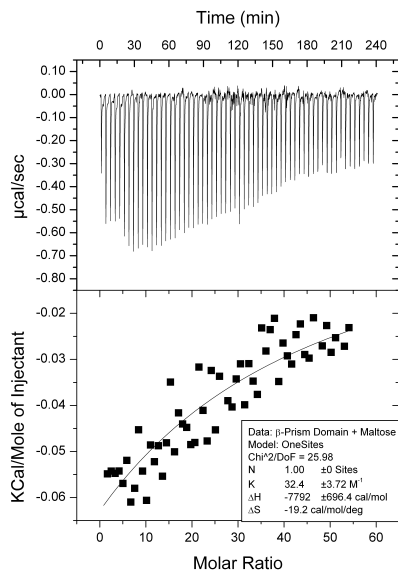

**Maltose**  
**(Glc $\alpha$ 1-4Glc)**

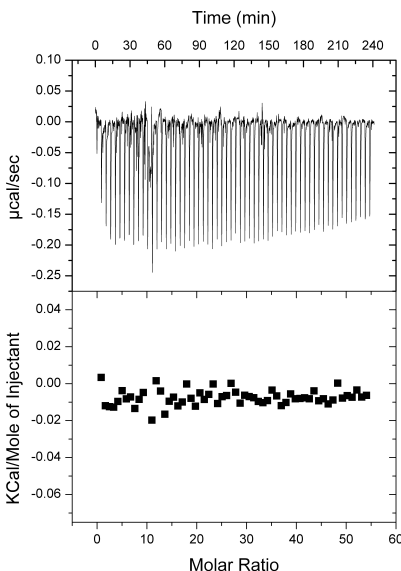

**Cellobiose**  
**(Glc $\beta$ 1-4Glc)**

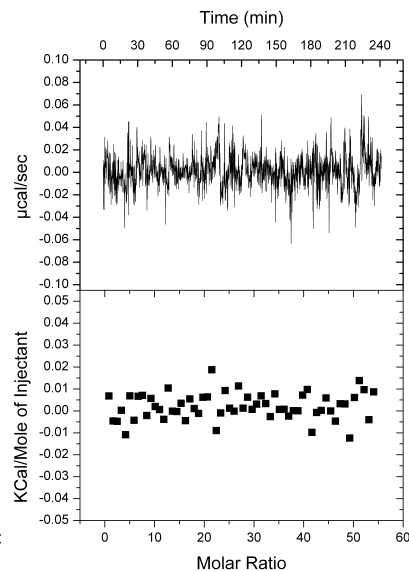

**N-Acetylglucosamine**

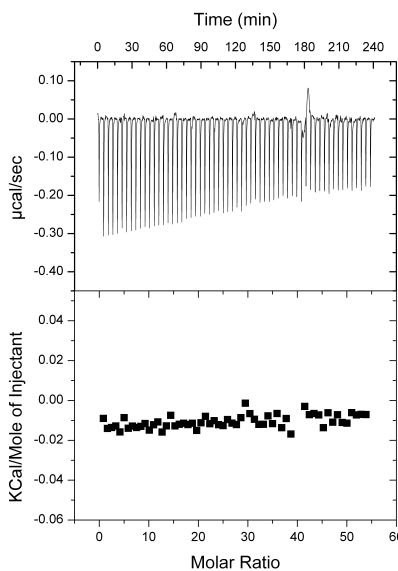

**Me- $\beta$ -Glucose**

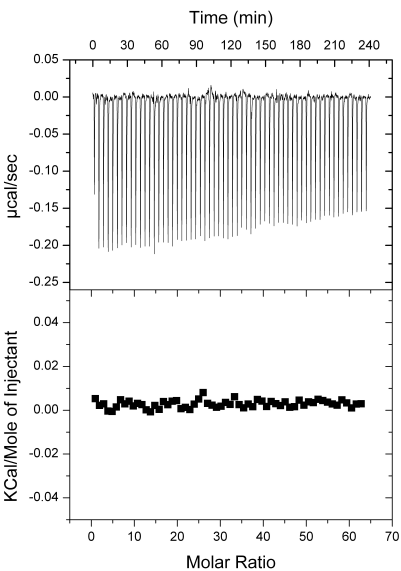

**Me- $\beta$ -Galactose**

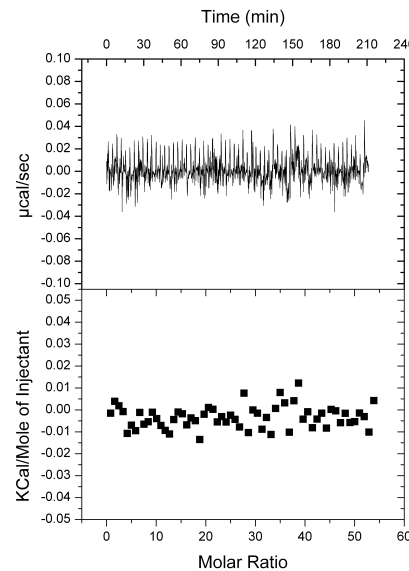

**L-Fucose**

Figure S2

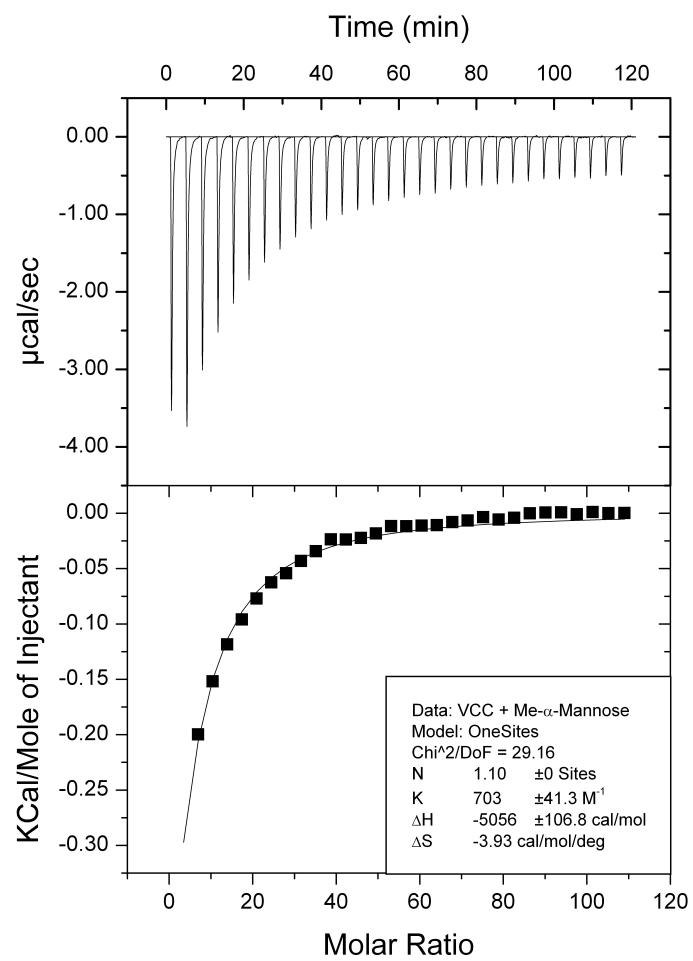

Figure S3

|                                                                  |                                |
|------------------------------------------------------------------|--------------------------------|
| <b>Data Statistics</b>                                           |                                |
| Resolution limits (Å)                                            | 86.4 - 2.7 (3.0-2.85)*         |
| Space Group                                                      | P3 <sub>1</sub> 2 <sub>1</sub> |
| Cell dimensions <i>a</i> , <i>b</i> , <i>c</i> (Å); $\gamma$ (°) | 99.8, 99.8, 172.4; 120.0       |
| Total Reflections (N)                                            | 116,049 (16,805)               |
| Unique Reflections (N)                                           | 23,691 (3,397)                 |
| Redundancy (%)                                                   | 4.9 (4.9)                      |
| Completeness (%)                                                 | 99.8 (100.0)                   |
| R <sub>sym</sub> (%)                                             | 21.1 (47.7)                    |
| R <sub>pim</sub> (%)                                             | 10.6 (24.0)                    |
| I/ $\sigma$ I (Mn(I/sd))                                         | 7.1 (3.2)                      |
| <b>Refinement Statistics</b>                                     |                                |
| Atoms                                                            | 5853                           |
| R-work (%)                                                       | 19.5                           |
| R-free (%)                                                       | 24.8                           |
| R.m.s. dev. bonds (Å)                                            | 0.005                          |
| R.m.s. dev angles (°)                                            | 1.045                          |
| Average B-value                                                  | 24.7                           |
| <b>Ramachandran statistics</b>                                   |                                |
| Most favored (%)                                                 | 96.4                           |
| Disallowed (%)                                                   | 0.0                            |

Figure S4

---

\* Numbers in parentheses denote highest resolution shell.

| Chart Number | Glycan Structure                                                                                  | Normalized Signal | RFU Measured |             |
|--------------|---------------------------------------------------------------------------------------------------|-------------------|--------------|-------------|
|              |                                                                                                   |                   | 10 ug/mL VCC | 1 ug/mL VCC |
| 328          |                                                                                                   | 1.00              | 21665        | 2089        |
|              | Galb1-4(Fuca1-3)GlcNAcb1-2Mana1-6(Galb1-4(Fuca1-3)GlcNAcb1-2Mana1-3)Manb1-4GlcNAcb1-4GlcNAcb-Sp20 |                   |              |             |
| 325          |                                                                                                   | 0.77              | 19702        | 1322        |
|              | Galb1-3GlcNAcb1-2Mana1-6(Galb1-3GlcNAcb1-2Mana1-3)Manb1-4GlcNAcb1-4GlcNAcb-Sp19                   |                   |              |             |
| 404          |                                                                                                   | 0.66              | 14686        | 1325        |
|              | Gala1-4Galb1-3GlcNAcb1-2Mana1-6(Gala1-4Galb1-3GlcNAcb1-2Mana1-3)Manb1-4GlcNAcb1-4GlcNAcb-Sp19     |                   |              |             |
| 53           |                                                                                                   | 0.57              | 11490        | 1278        |
|              | GlcNAcb1-2Mana1-6(GlcNAcb1-2Mana1-3)Manb1-4GlcNAcb1-4GlcNAcb-Sp13                                 |                   |              |             |
| 352          |                                                                                                   | 0.49              | 6875         | 1394        |
|              | Mana1-6(Galb1-4GlcNAcb1-2Mana1-3)Manb1-4GlcNAcb1-4GlcNAcb-Sp12                                    |                   |              |             |
| 364          |                                                                                                   | 0.38              | 6848         | 942         |
|              | Gala1-3Galb1-4GlcNAcb1-2Mana1-6(Gala1-3Galb1-4GlcNAcb1-2Mana1-3)Manb1-4GlcNAcb1-4GlcNAcb-Sp20     |                   |              |             |
| 54           |                                                                                                   | 0.36              | 5026         | 1027        |
|              | Galb1-3GlcNAcb1-2Mana1-6(Galb1-3GlcNAcb1-2Mana1-3)Manb1-4GlcNAcb1-4(Fuca1-6)GlcNAcb-Sp22          |                   |              |             |



|     |                                                                                                  |      |      |      |
|-----|--------------------------------------------------------------------------------------------------|------|------|------|
| 398 |                                                                                                  | 0.35 | 5230 | 971  |
|     | GlcNAcb1-2Mana1-6(Galb1-4GlcNAcb1-2Mana1-3)Manb1-4GlcNAcb1-4GlcNAc-Sp12                          |      |      |      |
| 347 |                                                                                                  | 0.34 | 2745 | 1152 |
|     | Mana1-6(Neu5Aca2-6Galb1-4GlcNAcb1-2Mana1-3)Manb1-4GlcNAcb1-4GlcNAc-Sp12                          |      |      |      |
| 389 |                                                                                                  | 0.33 | 4904 | 911  |
|     | GlcNAcb1-2Mana1-6 (GlcNAcb1-4(GlcNAcb1-2) Mana1-3)Manb1-4GlcNAcb1-4 GlcNAc-Sp21                  |      |      |      |
| 355 |                                                                                                  | 0.30 | 5670 | 719  |
|     | Galb1-3GlcNAcb1-2Mana1-6 (Galb1-3GlcNAcb1-2Mana1-3) Manb1-4GlcNAcb1-4 (Fuca1-6)GlcNAcb-Sp22      |      |      |      |
| 52  |                                                                                                  | 0.30 | 4237 | 862  |
|     | GlcNAcb1-2Mana1-6 (GlcNAcb1-2Mana1-3) Manb1-4GlcNAcb1-4 GlcNAcb-Sp12                             |      |      |      |
| 399 |                                                                                                  | 0.27 | 3154 | 844  |
|     | Galb1-4GlcNAcb1-2Mana1-6 (GlcNAcb1-2Mana1-3) Manb1-4GlcNAcb1-4 GlcNAc-Sp12                       |      |      |      |
| 561 |                                                                                                  | 0.25 | 3235 | 744  |
|     | Gala1-3Galb1-4GlcNAcb1-2 Mana1-6(Gala1-3Galb1-4 GlcNAcb1-2Mana1-3)Manb1-4 GlcNAcb1-4GlcNAc-Sp24  |      |      |      |
| 405 |                                                                                                  | 0.24 | 2579 | 739  |
|     | Gala1-4Galb1-4GlcNAcb1-2 Mana1-6(Gala1-4Galb1-4 GlcNAcb1-2Mana1-3)Manb1-4 GlcNAcb1-4GlcNAcb-Sp24 |      |      |      |



|     |                                                                                                                        |      |      |     |
|-----|------------------------------------------------------------------------------------------------------------------------|------|------|-----|
| 327 |                                                                                                                        | 0.18 | 2106 | 530 |
|     | <p>Neu5Aca2-3Galb1-4 GlcNAcb1-2Mana1-6<br/>(Neu5Aca2-6Galb1-4 GlcNAcb1-2Mana1-3)Manb1-4<br/>GlcNAcb1-4GlcNAcb-Sp12</p> |      |      |     |
| 56  |                                                                                                                        | 0.18 | 1918 | 585 |
|     | <p>Neu5Aca2-6Galb1-4 GlcNAcb1-2Mana1-6<br/>(Neu5Aca2-6Galb1-4 GlcNAcb1-2Mana1-3)Manb1-4<br/>GlcNAcb1-4GlcNAcb-Sp13</p> |      |      |     |
| 302 |                                                                                                                        | 0.17 | 2861 | 443 |
|     | <p>Neu5Aca2-6Galb1-4 GlcNAcb1-2Mana1-6(Galb1-4<br/>GlcNAcb1-2Mana1-3)Manb1-4 GlcNAcb1-4GlcNAcb-<br/>Sp12</p>           |      |      |     |

Key:

| Sugar                | Symbol |
|----------------------|--------|
| Neuraminic Acid      |        |
| Galactose            |        |
| N-acetyl glucosamine |        |
| Mannose              |        |
| Fucose               |        |

Sp12 – Asparagine

Sp13 - Glycine

Sp19 – EN or NK

Sp20 - GENR

Sp21 - -N(CH<sub>3</sub>)-O-(CH<sub>2</sub>)<sub>2</sub>-NH<sub>2</sub>

Sp22 - NST

Sp23 – (OCH<sub>2</sub>CH<sub>2</sub>)<sub>6</sub>NH<sub>2</sub>

Sp24 - KVANKT

Figure S5

| Chart Number | Glycan Structure                                                                          | Normalized Signal | RFU Measured |             |
|--------------|-------------------------------------------------------------------------------------------|-------------------|--------------|-------------|
|              |                                                                                           |                   | 10 ug/mL VCC | 1 ug/mL VCC |
| 152          | 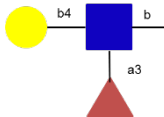         | 0.003             | 70           | 54          |
|              | Galb1-4(Fuca1-3)GlcNAcb-Sp0                                                               |                   |              |             |
| 150          |          | 0.003             | 70           | 87          |
|              | Galb1-3GlcNAcb1-Sp0                                                                       |                   |              |             |
| 116          |          | 0.004             | 97           | 52          |
|              | Gala1-3Galb1-4GlcNAcb-Sp8                                                                 |                   |              |             |
| 51           |          | 0.05              | 1153         | 679         |
|              | Mana1-6(Mana1-3)Manb1-4GlcNAcb1-4GlcNAcb-Sp13                                             |                   |              |             |
| 50           |          | 0.01              | 296          | 193         |
|              | Mana1-6(Mana1-3)Manb1-4GlcNAcb1-4GlcNAcb-Sp12                                             |                   |              |             |
| 213          |        | 0.005             | 107          | 72          |
|              | Mana1-2Mana1-6(Mana1-2Mana1-3)Mana1-6(Mana1-2Mana1-2Mana1-3)Manb1-4GlcNAcb1-4GlcNAcb-Sp12 |                   |              |             |

Figure S6

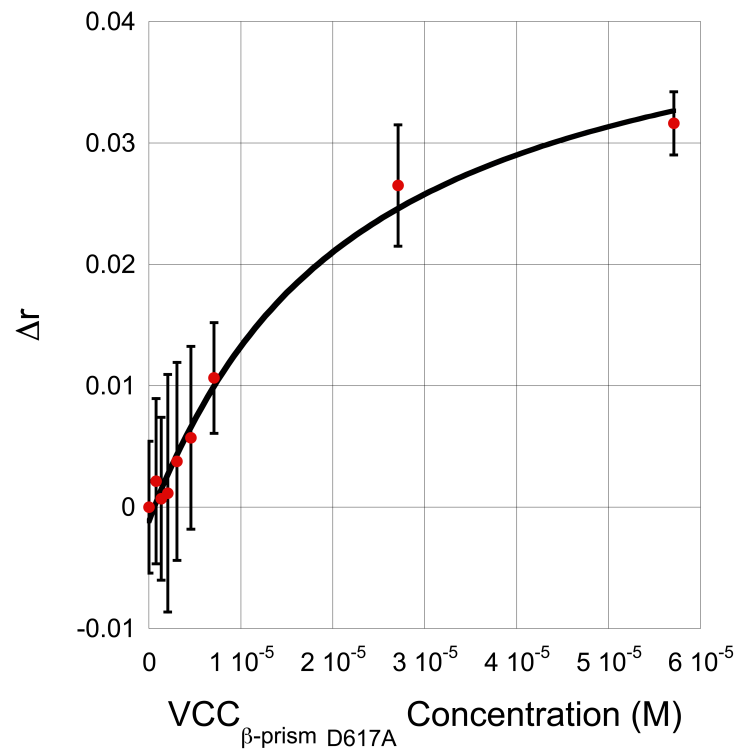

Figure S7

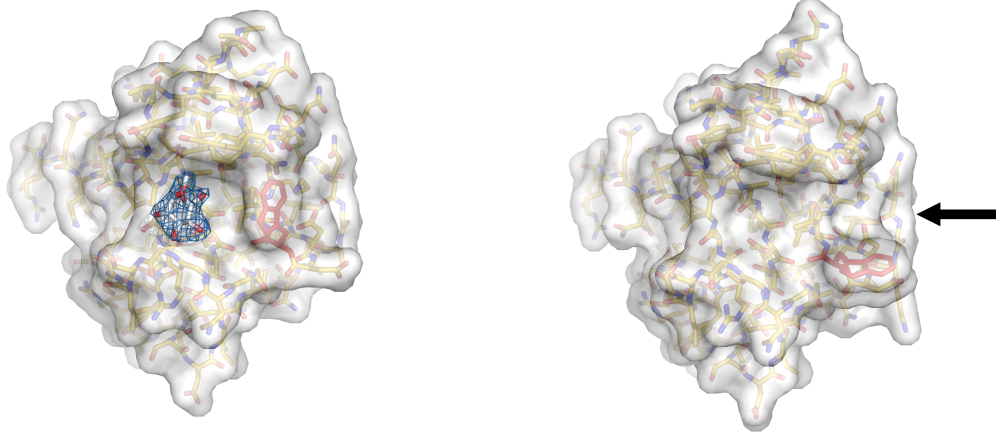

Figure S8
